# Supplementary material
Source: Springer Nature journal article supplement (https://www.springermedizin.de/resource/supplementary/13075_2009_2750_MOESM8_ESM.pdf/9692798)

**(a)**

pit area (mm<sup>2</sup>) / bone slice

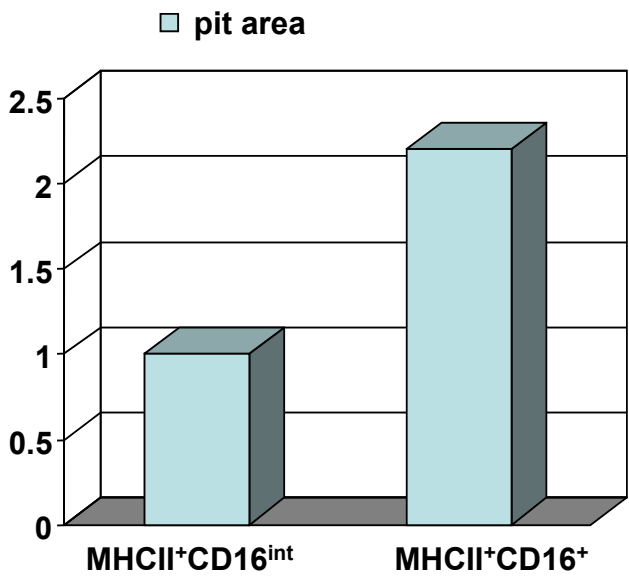

**(b)**

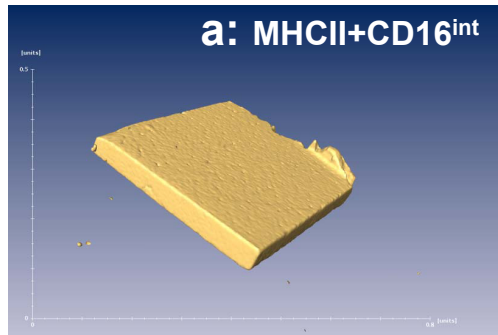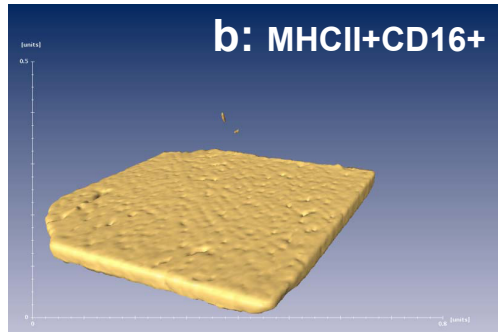

Supplement: MOESM8 [file 9692798]
